# Supplementary material for: A novel near-infrared fluorescent hydrogen sulfide probe for live cell and tissue imaging
Source: Royal Society of Chemistry journal article supplement (doi:10.1039/c9nj00210c), 2019-01-01
Supplement: c9nj00210c1.pdf [file c9nj00210c1.pdf]

## Supporting information

### **A novel near-infrared fluorescent hydrogen sulfide probe for live cells and tissues imaging**

Xiaoting Huang<sup>a, 1</sup>, Haiyang Liu<sup>b, 1</sup>, Jiewen Zhang<sup>a</sup>, Boren Xiao<sup>a</sup>, Fengxu Wu<sup>c</sup>, Yueying

Zhang<sup>a</sup>, Ying Tan<sup>a\*</sup> and Yuyang Jiang<sup>a,d\*</sup>

<sup>a</sup> State Key Laboratory of Chemical Oncogenomics, Key Laboratory of Chemical Biology, The Graduate School at Shenzhen, Tsinghua University, Shenzhen 518055, P. R. China.

<sup>b</sup> Key Laboratory of Optoelectronic Devices and Systems of Ministry of Education and Guangdong Province, College of Optoelectronic Engineering, Shenzhen University, Shenzhen 518060, PR China.

<sup>c</sup> College of Chemistry, Central China Normal University, Wuhan 430079, P. R. China.

<sup>d</sup> Department of Pharmacology and Pharmaceutical Sciences, School of Medicine, Tsinghua University, Beijing, 100084, P. R. China.

\* Corresponding authors (Y. Tan and Y. Jiang)

Tel: +86-0755-26036017, Fax: +86-0755-26032094

Email: tan.ying@sz.tsinghua.edu.cn (Y. Tan), jiangyy@sz.tsinghua.edu.cn (Y. Jiang)

<sup>1</sup> The two authors contributed equally to the work.

## 1. The characterization of the REDCP and NIR-NP

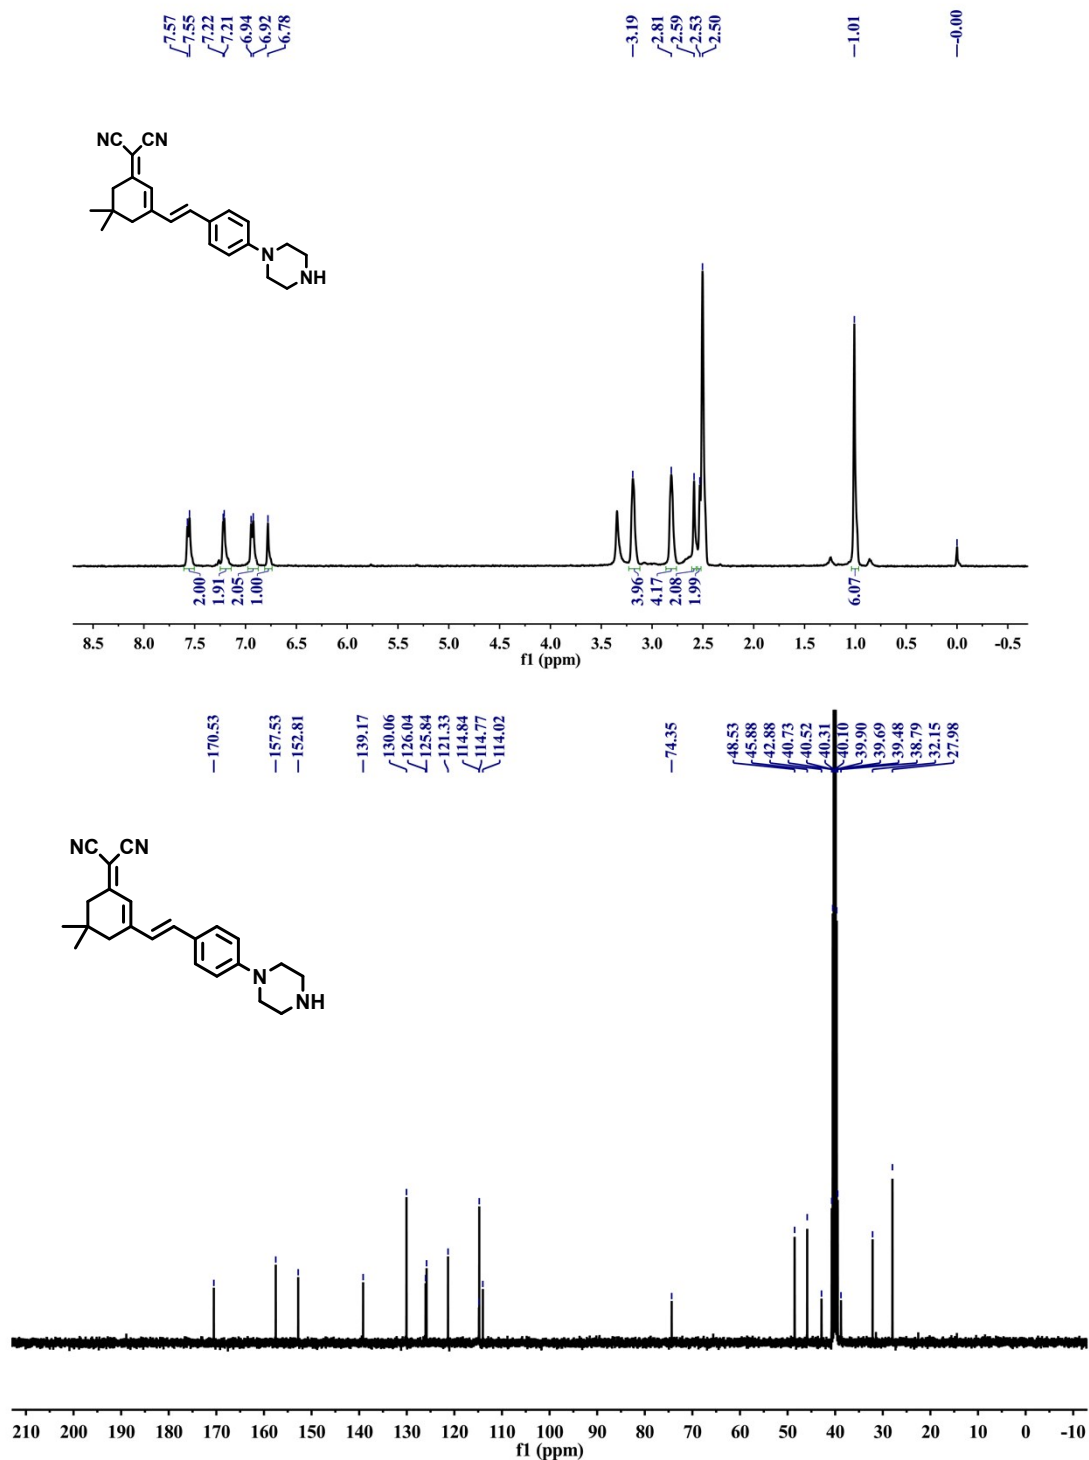

Fig.S1. <sup>1</sup>H NMR and <sup>13</sup>C NMR spectrum of REDCP (DMSO-D<sub>6</sub>, 400 MHz)

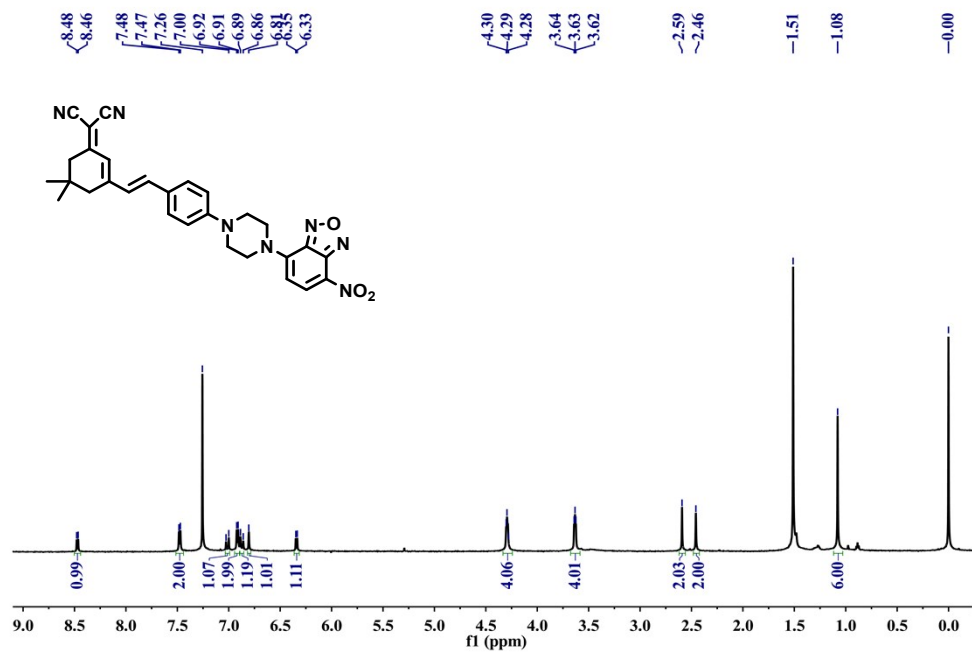

Fig.S2. <sup>1</sup>H NMR spectrum of NIR-NP (CDCl<sub>3</sub>-D<sub>6</sub>, 600 MHz)

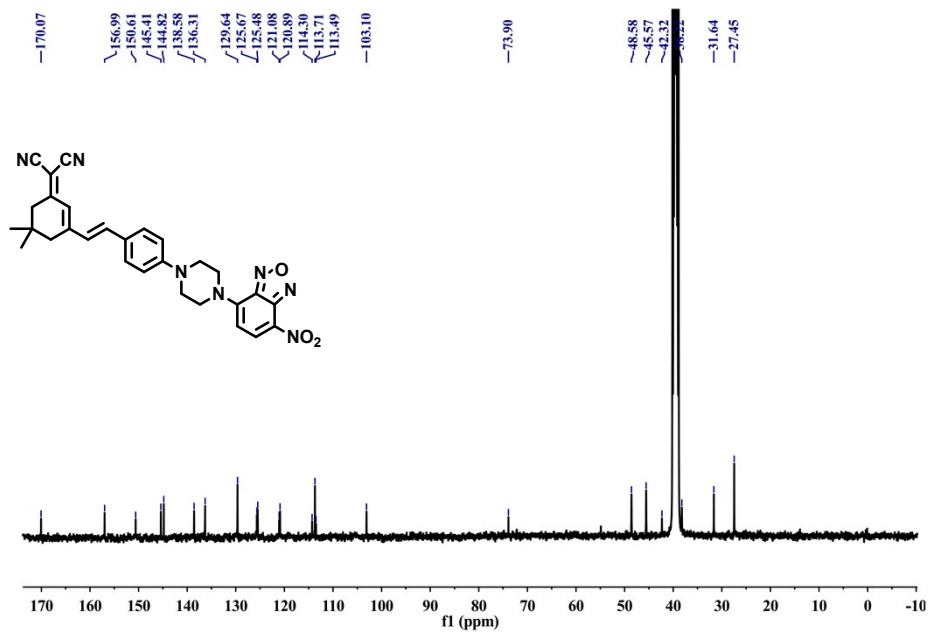

Fig.S3. <sup>13</sup>C NMR spectrum of NIR-NP (DMSO-D<sub>6</sub>, 400 MHz)

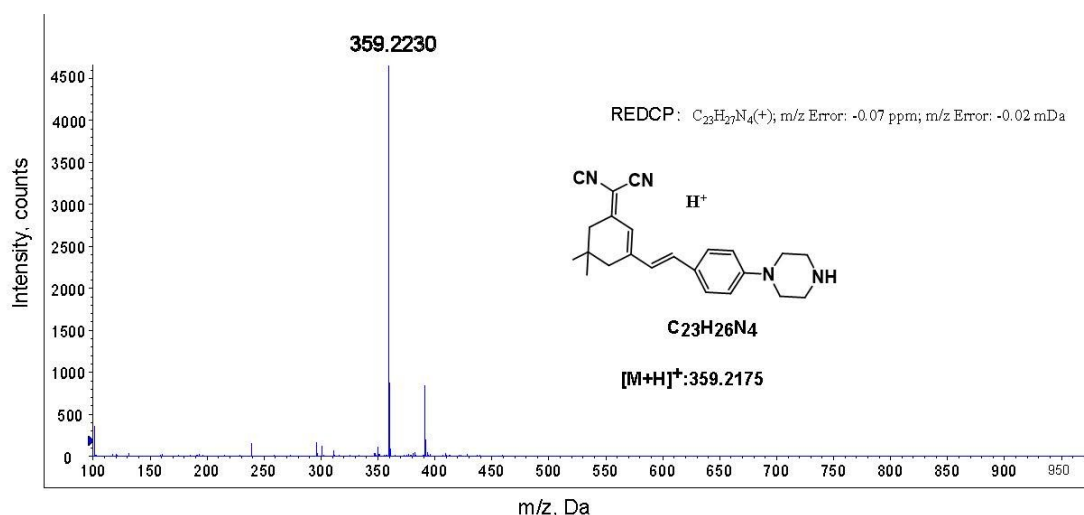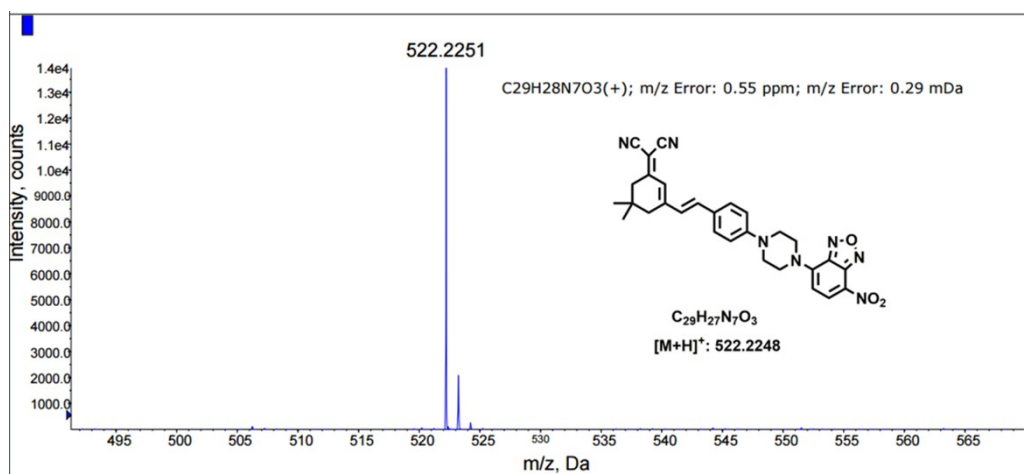

Fig.S4. HRMS of REDCP m/z Calcd. .for  $C_{23}H_{26}N_4$ : 359.2175 $[M+H]^+$ , found: 359.2230 and NIR-NP m/z Calcd. .for  $C_{29}H_{28}N_7O_3$ : 522.2248 $[M+H]^+$ , found: 522.2251.

## 2. The UV and fluorescence properties of the NIR-NP probe

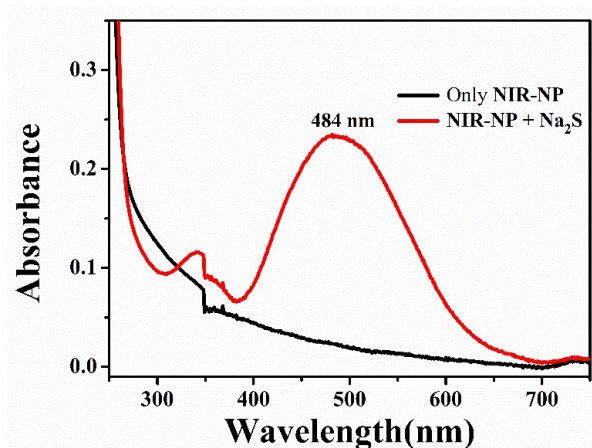

Fig.S5. The change of ultraviolet visible light absorption NIR-NP (10  $\mu M$ ) was analyzed in the absence (black) and presence (red) of 100  $\mu M$   $Na_2S$ .

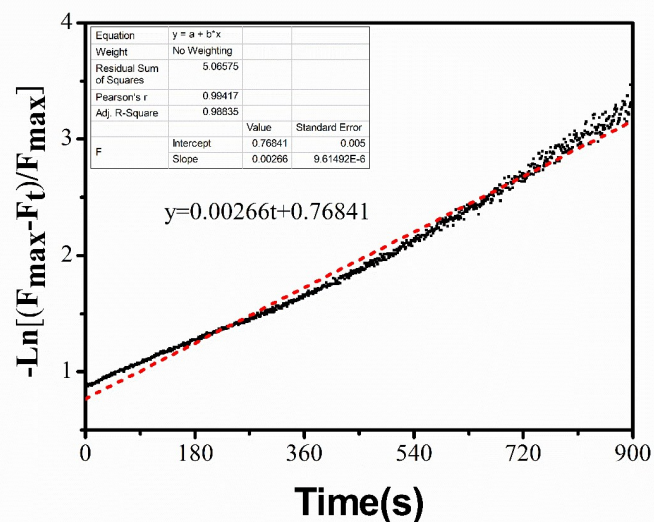

Fig. S6. Pseudo first-order kinetic plot of the reaction of NIR-NP (10  $\mu\text{M}$ ) with  $\text{Na}_2\text{S}$  (100  $\mu\text{M}$ ), slope =  $0.00266 \times 10^{-3}$ , so  $k' = 2.7 \times 10^{-3} \text{ s}^{-1}$ .

### 3. The probe properties was analyzed in biological systems

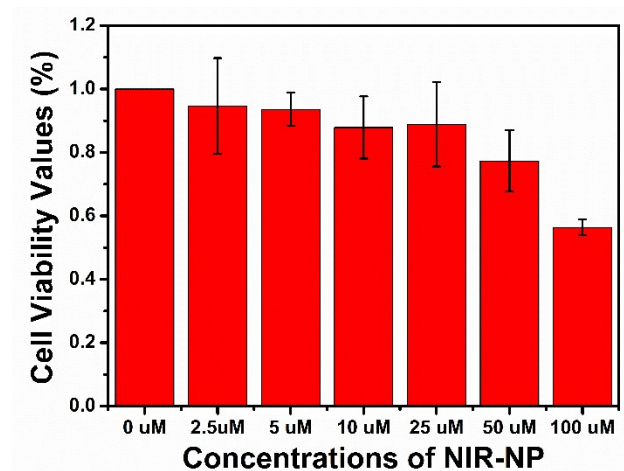

Fig.S7. Cell viability of HeLa cells after 24 hours by CCK-8 assay, and the experiment was repeated three times and the data are shown as mean ( $\pm\text{SD}$ ).

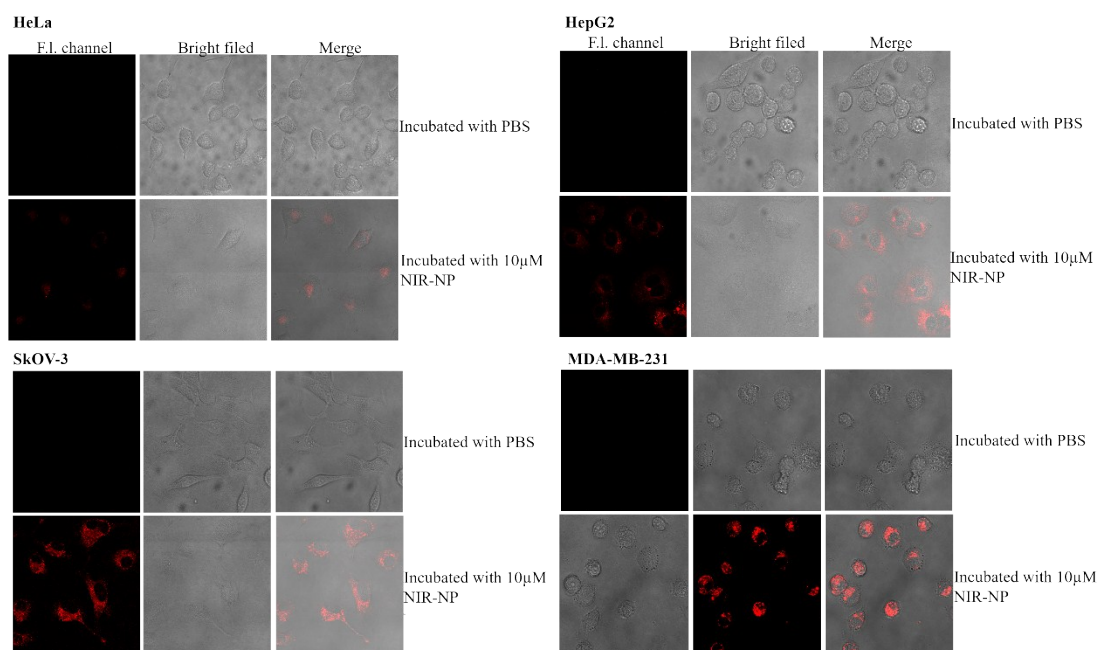

**Fig.S8.** The confocal imaging of different tumor cells. The cells was incubated with PBS as control (above) and incubation with 10  $\mu\text{M}$  probe **NIR-NP** for 30min (below). Confocal images was performed by confocal microscopy:  $\lambda_{\text{ex}}$ : 440 nm /  $\lambda_{\text{em}}$ : 600-700 nm.

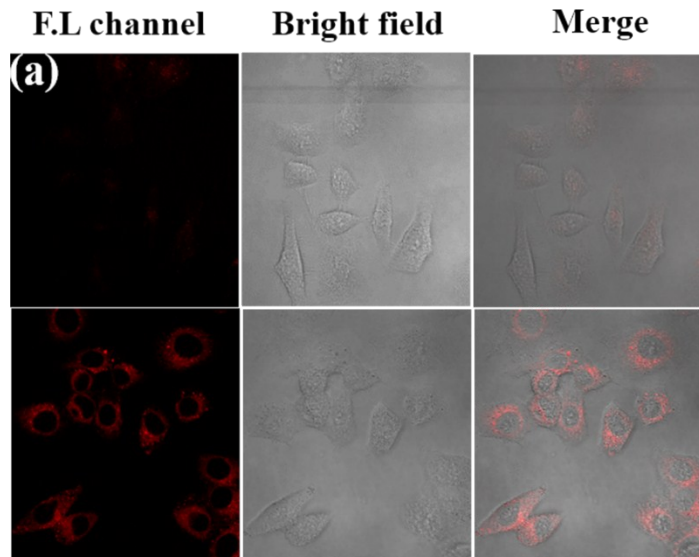

**Fig.S9. (a)** HepG2 cells were pre-treated with 1mM PAG for 1 h and then incubated with 10  $\mu\text{M}$  **NIR-NP**; **(b)** pre-treated with 1 mM PAG for 1 h and incubated 10  $\mu\text{M}$  **NIR-NP**, then incubated with 100  $\mu\text{M}$   $\text{Na}_2\text{S}$  for 30 min; confocal image was performed by confocal microscopy:  $\lambda_{\text{ex}}$ : 440 nm /  $\lambda_{\text{em}}$ : 600-700 nm.

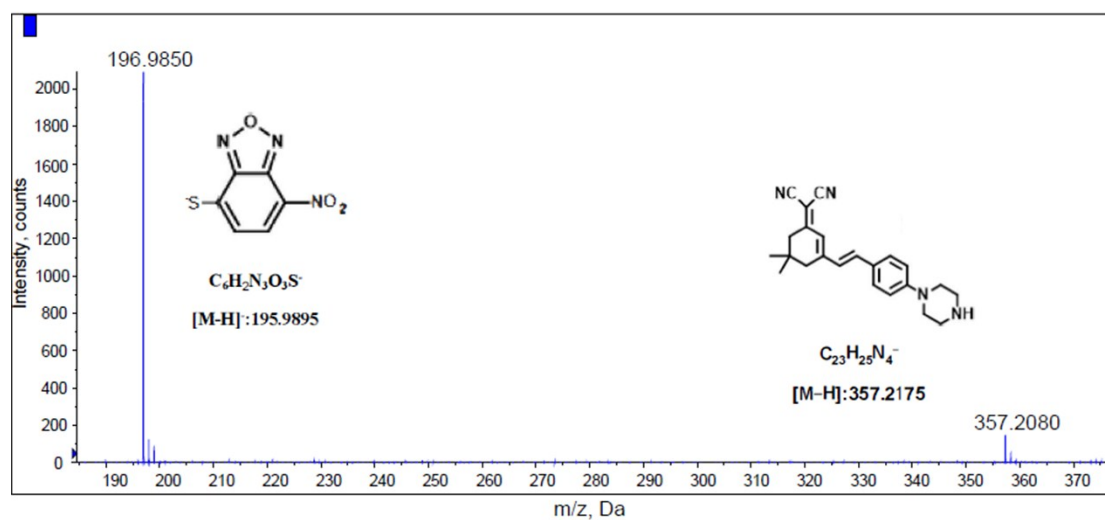

**Fig.S10.** HRMS spectra for analyzing the reaction mechanism of NIR-NP and  $Na_2S$ , and the REDCP-H whose  $m/z$  Calcd.for  $C_{23}H_{25}N_4^-$ : 357.2175  $[M-H]$ , found: 357.2080 and NBD-SH,  $m/z$  Calcd.for  $C_6H_2N_3O_3S^-$ : 195.9895  $[M-H]$ , found 195.9850 with negative mode.

**Table S1** Comparison of **NIR-NP** with recently reported probes for detection of  $\text{H}_2\text{S}$

| Recognition process                                                                 | LOD                 | Stokes Shift | Fluorescence signal | Ref.      |
|-------------------------------------------------------------------------------------|---------------------|--------------|---------------------|-----------|
| 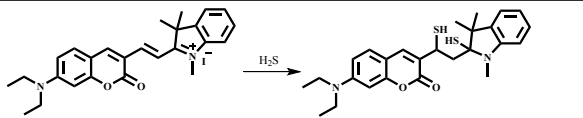   | 0.014 $\mu\text{M}$ | no data      | Turn-Off            | 1         |
|    | 0.050 $\mu\text{M}$ | 135 nm       | Turn-On             | 2         |
|    | 2.240 $\mu\text{M}$ | 146 nm       | Turn-On             | 3         |
|    | 0.020 $\mu\text{M}$ | 170 nm       | Turn-On             | 4         |
|   | 0.130 $\mu\text{M}$ | 47 nm        | Turn-On             | 5         |
|  | 0.139 $\mu\text{M}$ | 73 nm        | Blue-Shift          | 6         |
|  | 0.260 $\mu\text{M}$ | 40 nm        | Turn-On             | 7         |
|  | 0.500 $\mu\text{M}$ | 57 nm        | Blue-Shift          | 8         |
|  | 0.037 $\mu\text{M}$ | 22 nm        | Turn-On             | 9         |
|  | 0.360 $\mu\text{M}$ | 193 nm       | Turn-On             | 10        |
|  | 0.030 $\mu\text{M}$ | 186 nm       | Turn-On             | This work |



## Reference

- 1 Y. Yang, C. Yin, F. Huo, Y. Zhang, J. Chao. *Sens. Actuators B: Chem.* 2014, **203**, 596-601.
- 2 S. Singha, D. Kim, H. Moon, T. Wang, K.H. Kim, Y.H. Shin, et al. *Anal. Chem.* 2015, **87**, 1188-1195.
- 3 Z. Hai, Y. Bao, Q. Miao, X. Yi, G. Liang. *Anal. Chem.* 2015, **87**, 2678-2684.
- 4 P. Hou, H. Li, S. Chen. *Tetrahedron.* 2016, **72**, 3531-3534.
- 5 S.I. Reja, N. Sharma, M. Gupta, P. Bajaj, V. Bhalla, R.D. Parihar, et al. *Chemistry.* 2017, **23**, 9872-9878.
- 6 X. Zhang, H. Tan, Y. Yan, Y. Hang, F. Yu, X. Qu, et al. *J. Mater. Chem. B.* 2017, **5**, 2172-2180.
- 7 C.S. Park, T.H. Ha, S.A. Choi, D.N. Nguyen, S. Noh, O.S. Kwon, et al. *Biosens. Bioelectron.* 2017, **89**, 919-926.
- 8 M. Chen, R. Chen, Y. Shi, J. Wang, Y. Cheng, Y. Li, et al. *Adv. Funct. Mater.* 2018, **28**, 1704689-1704699.
- 9 S.K. Asthana, A. Kumar, Neeraj, Shweta, K.K. Upadhyay. *Org. Biomol. Chem.* 2016, **14**, 3690-3694.
- 10 S. Chen, H. Li, P. Hou. *Sens. Actuators B: Chem.* 2018, **256**, 1086-1092.
